# Supplementary material for: Phenotypic instability of Arabidopsis alleles affecting a disease Resistance gene cluster
Source: PubMed Central journal article supplement (PMC2374787; doi:10.1186/1471-2229-8-36), 2008-04-14

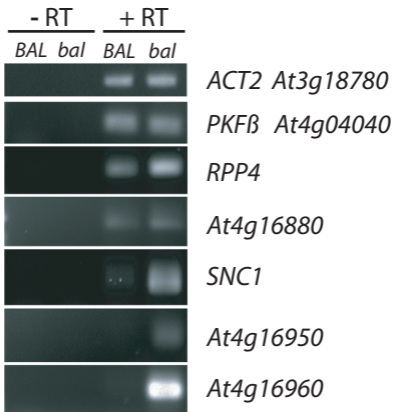

Supplement: 1471-2229-8-36-S1.pdf [file 1471-2229-8-36-S1.pdf]
