# Supplementary material for: Phenotypic instability of Arabidopsis alleles affecting a disease Resistance gene cluster
Source: PubMed Central journal article supplement (PMC2374787; doi:10.1186/1471-2229-8-36), 2008-04-14

# Short day condition

---

*35S::SNC1 x bal*

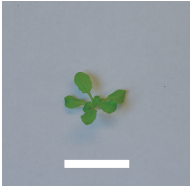

*35S::SNC1 x cpr1*

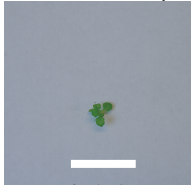

Supplement: 1471-2229-8-36-S2.pdf [file 1471-2229-8-36-S2.pdf]
